# Supplementary material for: Molecular resonant dissociation of surface-adsorbed molecules by plasmonic nanoscissors
Source: Royal Society of Chemistry journal article supplement (doi:10.1039/c3nr06799h), 2014-01-01
Supplement: c3nr06799h1.pdf [file c3nr06799h1.pdf]

Supplementary Information

## **Molecular Resonant Dissociation of Surface-Adsorbed Molecules by Plasmonic Nanoscissors**

Zhenglong Zhang,<sup>a,b,c</sup> Shaoxiang Sheng,<sup>a</sup> Hairong Zheng,<sup>b</sup> Hongxing Xu,<sup>a</sup> Mengtao Sun<sup>a,\*</sup>

<sup>a</sup> Beijing National Laboratory for Condensed Matter Physics, Institute of Physics, Chinese Academy of Sciences, P. O. Box 603-146, Beijing, 100190, People's Republic of China.

<sup>b</sup> School of Physics and Information Technology, Shaanxi Normal University, Xi'an, 710062, People's Republic of China.

<sup>c</sup> Leibniz Institute of Photonic Technology, Albert-Einstein-Str. 9, 07745, Jena, Germany.

4 Figures

3 Tables

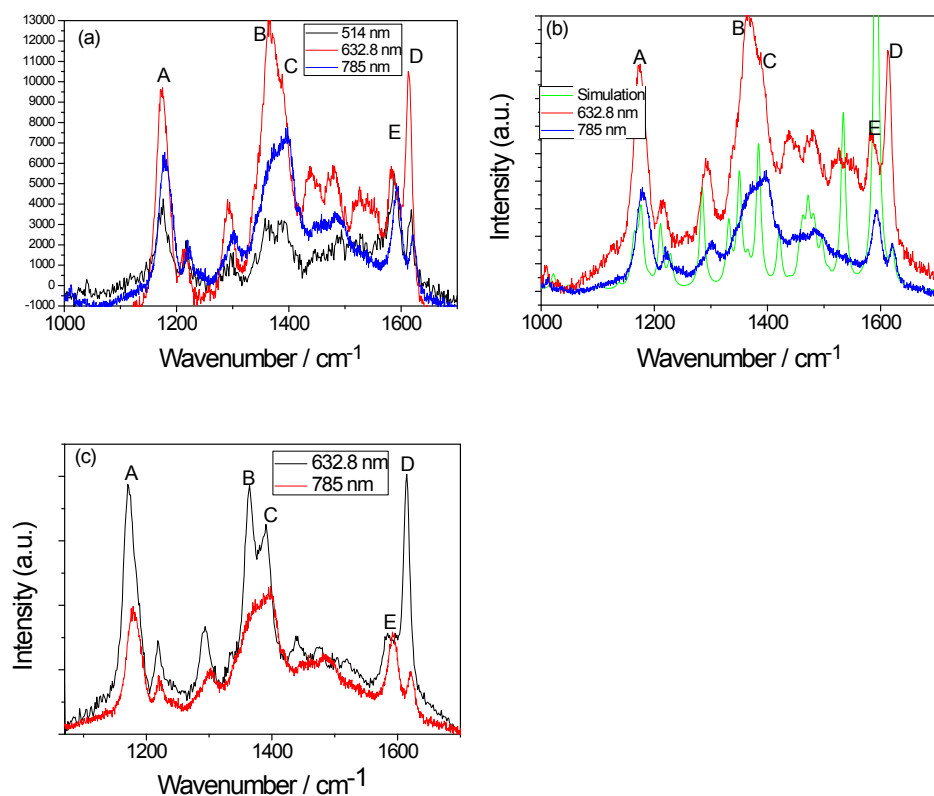

Figure S1. (a) The SERS spectra of MG in Ag sol excited at different frequencies, and (b) the comparison between the simulated normal Raman spectrum and experimental SERS spectra, where the simulated normal Raman frequencies were scaled by 0.965, and (c) the comparison between TERRS excited at 632.8 nm and SERS excited at 785 nm.

|                 |      |
|-----------------|------|
| a <sub>39</sub> | 1176 |
| a <sub>41</sub> | 1211 |
| b <sub>44</sub> | 1284 |
| a <sub>45</sub> | 1350 |
| b <sub>49</sub> | 1385 |
| a <sub>47</sub> | 1420 |
| b <sub>55</sub> | 1471 |
| a <sub>66</sub> | 1534 |
| b <sub>61</sub> | 1591 |
| a <sub>58</sub> | 1620 |

Table S1. The calculated vibration frequencies ( $\text{cm}^{-1}$ ) and vibrational modes of MG, according to the simulated spectrum (green line) in Fig. S1(b).

|          |      |
|----------|------|
| $b_{31}$ | 1180 |
| $b_{32}$ | 1196 |
| $a_{31}$ | 1204 |
| $a_{32}$ | 1284 |
| $a_{33}$ | 1302 |
| $b_{36}$ | 1344 |
| $b_{37}$ | 1356 |
| $a_{34}$ | 1402 |
| $a_{39}$ | 1472 |
| $b_{41}$ | 1482 |
| $b_{42}$ | 1555 |
| $b_{43}$ | 1572 |
| $a_{40}$ | 1600 |

Table S2. The calculated vibration frequencies ( $\text{cm}^{-1}$ ) and vibration modes of large fragment in Fig. 3(d).

|         |      |
|---------|------|
| $^2a_2$ | 1097 |
| $^1b_3$ | 1161 |
| $^2b_2$ | 1183 |
| $^1a_3$ | 1262 |
| $^2b_4$ | 1442 |
| $^2b_5$ | 1489 |
| $^1a_5$ | 1521 |

Table S3. The calculated vibration frequencies ( $\text{cm}^{-1}$ ) and vibration modes of small fragment in Fig. 3(e).

According to our experimental condition, it is monolayer, and the effective size is about

$\pi R^2 \approx 78.5 \text{ nm}^2$ , where  $R=5 \text{ nm}$  is the effective tip-enhanced region, because when  $R=5 \text{ nm}$ , the intensity of surface Plasmon is decreased to the half of the strongest Plasmon at the central gap (the below Figure was calculated using FDTD Solutions, where all of parameters in calculations were based on experimental conditions). From the calculation, the size of one molecule is around  $0.5 \text{ nm}^2$ , and then there are less than 157 molecules in the effective region.

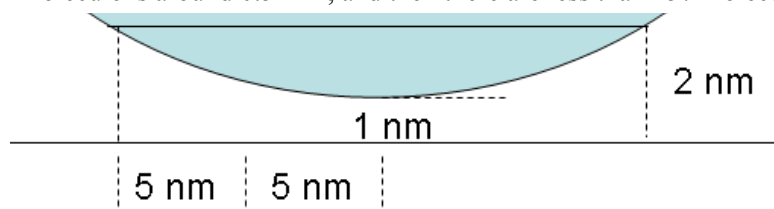

**Figure S2. | Plasmon intensity in the nanogap in HV-TERS.**

By comparing the intensity of peak C in Fig. 2 (a) and (c), more than 80% of 157 molecules have been dissociated. Also, by comparing the ratio of intensities of experimental and theoretical Raman peaks of G and I in Fig. 2(c), more than 40% molecules of  $\text{N}(\text{CH}_3)_2$  are still present.
